# Supplementary material for: Solubility of n-butane and 2-methylpropane (isobutane) in 1-alkyl-3-methylimidazolium-based ionic liquids with linear and branched alkyl side-chains
Source: Royal Society of Chemistry journal article supplement (doi:10.1039/c5cp05572e), 2015-01-01

## SUPPLEMENTARY INFORMATION

### Solubility of *n*-butane and 2-methylpropane (isobutane) in 1-alkyl-3-methylimidazolium-based ionic liquids with linear and branched alkyl side-chains

Laure Pison<sup>1</sup>, Karina Shimizu<sup>2</sup>, George Tamas<sup>4</sup>, José Nuno Canongia Lopes<sup>2,3</sup>, Edward L. Quitevis<sup>4</sup>, Margarida F. Costa Gomes<sup>1</sup>

<sup>1</sup>Clermont Université, Université Blaise Pascal, Institut de Chimie de Clermont-Ferrand, UMR 6296 CNRS, équipe Thermodynamique et Interactions Moléculaires, ICCF-TIM, BP 80026, F-63171 Aubièrre, France.

<sup>2</sup>Centro de Química Estrutural, Instituto Superior Técnico, Universidade de Lisboa, 1049 001 Lisboa, Portugal

<sup>3</sup>Instituto de Tecnologia Química e Biológica, Universidade Nova de Lisboa, 2580 157 Oeiras, Portugal

<sup>4</sup>Department of Chemistry & Biochemistry, Texas Tech University, Lubbock, Texas 79409, United States

#### NMR spectra of [(2mC<sub>3</sub>)C<sub>1</sub>im][Ntf<sub>2</sub>] and [(3mC<sub>4</sub>)C<sub>1</sub>im][Ntf<sub>2</sub>].

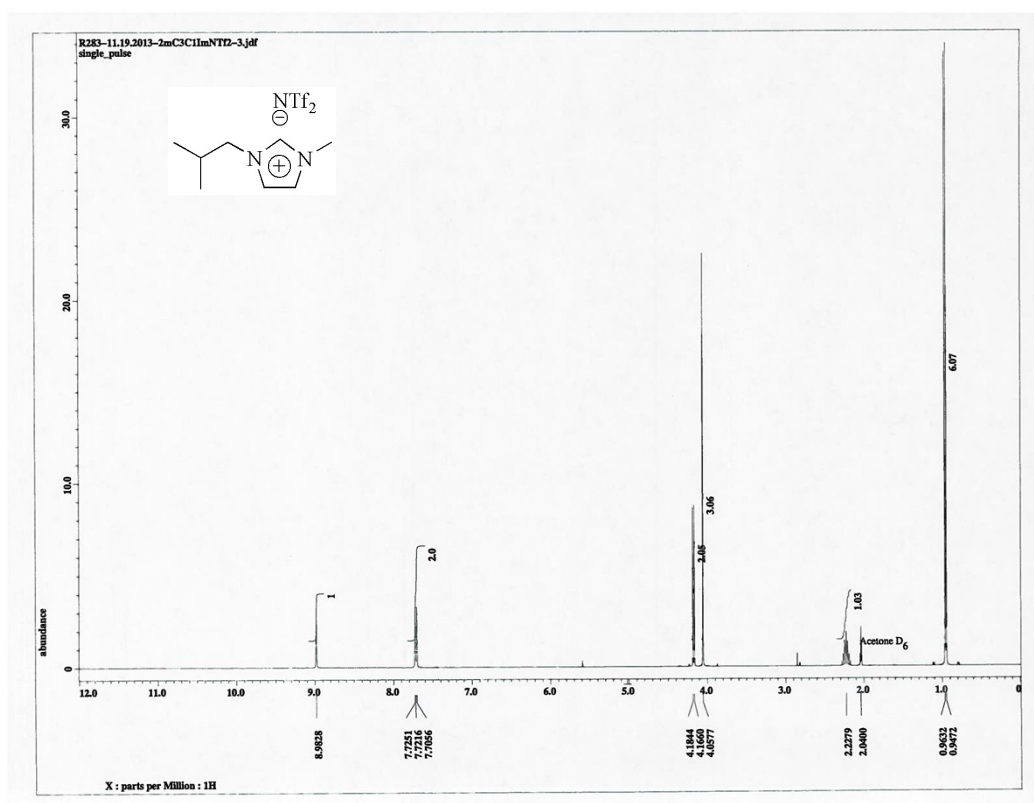

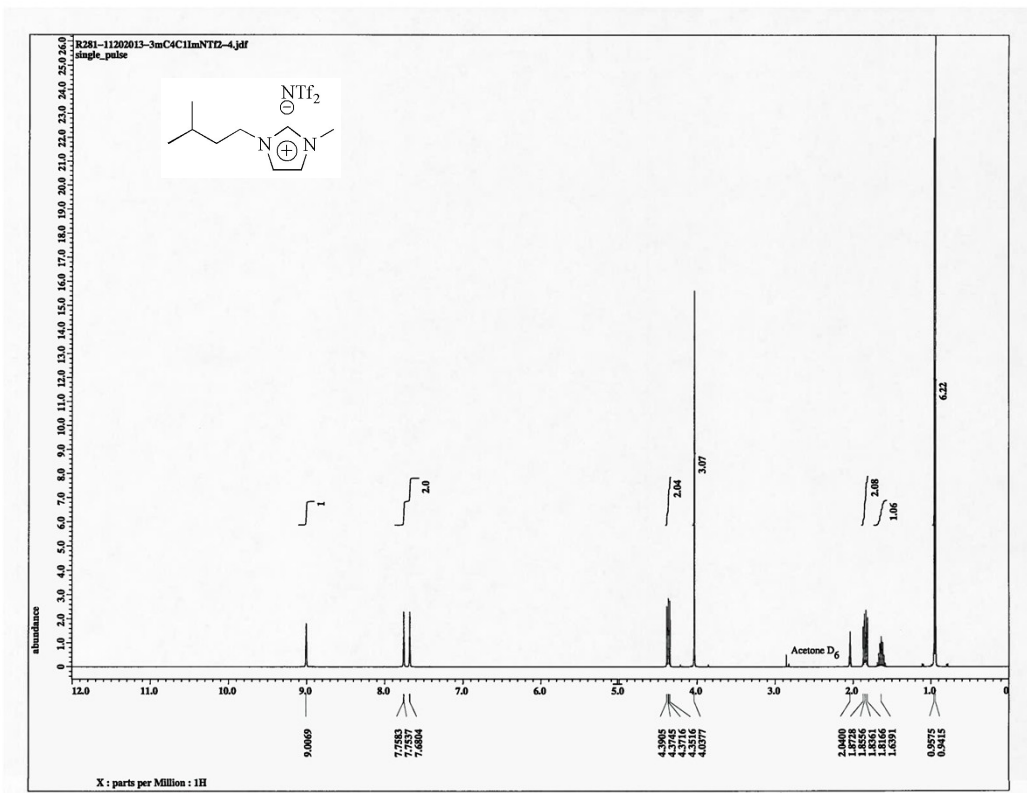

Supplement: c5cp05572e1.pdf [file c5cp05572e1.pdf]
